# Supplementary material
Source: publisher site journal article supplement (https://www.dovepress.com/article/358778)
Supplement: Supplementary file 1 [file get_supplementary_file.php]

**SUPPLEMENT**

**Title: Carbapenem Resistant Pseudomonas Aeruginosa Infections in Elderly Patients: Antimicrobial Resistance Profiles, Risk Factors and Impact on Clinical Outcomes**

**Authors:** Jie Qin1,2,Chengyun Zou2,Jianmin Tao1,Tian Wei1,Li Yan1,Yufei Zhang2,Haiying Wang1

1 Department of Clinical Laboratory, Yueyang Hospital of Integrated Traditional Chinese and Western Medicine, Shanghai University of Traditional Chinese Medicine, Shanghai, China;

2 Department of Medical Technology, Yueyang Clinical Medical College, Shanghai University of Traditional Chinese Medicine, Shanghai, China

**Supplementary Table 1 Inclusion Criteria of Patients:**

(1) All hospitalized patients with *P. aeruginosa* infection from January 1st 2018 to December 31st 2020 at Yueyang Hospital of Integrated Traditional Chinese and Western Medicine were the source population.

(2) Elderly patients, aged ≥ 65 years.

(3)*P. aeruginosa* isolate was cultured from qualified clinical specimens. We listed common diseases with appropriate clinical specimens, and specimen quality evaluated by examining the quantity and cellular composition.

| Common Diseases with Appropriate and Acceptable Clinical Specimens | | | |
| --- | --- | --- | --- |
| Anatomic site | Appropriate clinical specimens | Screening specimens requested for routine bacterial culture | |
| Screening method | Acceptable for results of screen |
| Lower respiration tract | Freshly expectorated mucus and inflammatory cells (pus), sputum | Microscopic examination of Gram-stained smear | The best sputum from all patients should have < 10 squamous epithelial cells / average low power field, and > 25 white blood cells/ average low power field, or the ratio of squamous epithelial cells to white blood cells is ≤ 1∶2.5. |
| Bronchoalveolar lavage | Microscopic examination of Gram-stained smear | The squamous cell count < 1% of the cell count |
| Endotracheal aspirate | Microscopic examination of Gram-stained smear | < 10 squamous epithelial cells/average low power field or ≥1 bacterium/per 20 immersion fields |
| Urinary tract | Midstream urine, urine collected by “straight'” catheterization, urine collected by suprapubic aspiration, urine collected during cystoscopy or other surgical procedure | Urinalysis, Gram stain of urine sediment | ＜ 3+ squamous epithelial cells on urinalysis. Positive leukocyte esterase test with ＞ 10 polymorphonuclear leukocytes/mm3 from symptomatic patient (patient with asymptomatic bacteriuria may not have increased number of leukocytes) |
| Superficial wound | Aspirations of pus or local irrigation fluid (nonbacteriostatic saline), swab of purulence originating from beneath the dermis | Microscope examination of Gram-stained smear | ＜ 2+ squamous epithelial cells, polymorphonuclear leukocytes present |
| Deep wound | Purulence, necrosis, or tissue from deep subcutaneous site |  |  |
| Venous blood | Two or three blood specimens collected from separate venipunctures, before initiation of antibiotics, each containing approx 20 ml of blood for patients >90 lb; antisepsis with iodine-containing compound or chlorhexidine |  |  |

(4) A nosocomial infection is one that is acquired in a hospital or health care facility (ie, the infection was not present or incubating at the time of admission), including infections acquired during hospitalization and infections acquired in a hospital and becomes evident after hospital discharge. An onset of symptoms more than 48 hours after admission.

(5)  Presence symptoms or signs of relevant organs’ or tissues’ infection.

(6) Elevated leukocyte count, neutrophil percentage, C-reactive protein and/or procalcitonin level, abnormal imaging examination:

laboratory findings: leukocyte count＞9.5×109 /L, neutrophil percentage＞75%, C-reactive protein ≥ 10.0 mg/L, and/or procalcitonin ≥ 0.5 mg/mL.

Abnormal imaging examination: patients with chronic airway diseases in stable stage (chronic bronchitis with or without obstructive emphysema, asthma, bronchiectasis) developed secondary acute infection, meanwhile chest X-ray showed significant changes or new lesions compared with those at admission.

(7) The patient’s condition significantly improved after receiving treatment with sensitive antibiotics for 3-5 days.

(8) During the study period, all P. aeruginosa infection patients were consecutively recruited and non-duplicated, only the first episode was reviewed and recorded.

**Exclusion Criteria of Patients:**

(1) Patients colonized/contaminated with CR/CS *P. aeruginosa* without any symptoms of infection of organ or tissue.

(2)Patients with incomplete case data.

**Reference**

[1]Patrick R. Murray, Ellen Jo Baron, James H. Jorgensen, Marie Louise Landry and Michel A.P faller. 2007. Specimen collection, transport, and processing: bacteriology. p.291-333. In Richard B. Thomson, JR. *Manual of Clinical Microbiology*. 9th ed, ASM Press, Washington.D.C.

[2]Shang Hong, Wang Yusan and Shen Ziyu. 2015. Bacteria inspection. p.629-646. National Clinical Laboratory Procedures. 4th, ed. People's Medical Publishing House.Beijing

[3] [Ministryof](javascript:;) [Health](javascript:;) [of](javascript:;) [the](javascript:;) [People's](javascript:;) [Republic](javascript:;) [of](javascript:;) [China](javascript:;). Diagnostic criteria for nosocomial infection (for trial implementation).National Medical Journal of China. 2001;81(5):314-320.

| **Supplementary Table 2 Departments distribution of** P. aeruginosa isolates | | |
| --- | --- | --- |
| **Department** | **CRPA % (N=155)** | **CSPA % (N=445)** |
|  | **n(%)** | **n(%)** |
| Geriatrics dept. | 29.0 (45/155) | 10.1 (45/445) |
| Intensive care unit | 16.8 (26/155) | 9.7 (43/445) |
| Pneumology dept. | 8.4 (13/155) | 9.7 (43/445) |
| Neurosurgery dept. | 7.7 (12/155) | 6.1 (27/445) |
| Emergency dept. | 7.7 (12/155) | 11.2 (50/445) |
| Hematology dept. | 6.5 (10/155) | 5.2 (23/445) |
| Neurology dept. | 4.5 (7/155) | 7.4 (33/445) |
| Traditional Chinese medicine dept. | 3.9 (6/155) | 4.0 (18/445) |
| Acupuncture dept. | 3.9 (6/155) | 3.1 (14/445) |
| Surgical surgery | 2.6 (4/155) | 4.7 (21/445) |
| Nephrology dept. | 1.3 (2/155) | 5.4 (24/445) |
| Dermatology dept. | 1.3 (2/155) | 2.5 (11/445) |
| Gastroenterology dept. | 0.6 (1/155) | 1.8 (8/445) |
| Oncology dept. | 0.6 (1/155) | 7.4 (33/445) |
| Urology dept. | 0.6 (1/155) | 0.7 (3/445) |
| Cardiology dept. | 0.6 (1/155) | 2.9 (13/445) |
| Rheumatology ＆ Immunology dept. | 0 | 2.7 (12/445) |
| Gastrointestinal ＆ Colorectal surgery | 0 | 2.2 (10/445) |
| Others | 3.9 (6/155) | 5.4 (24/445) |
| Abbreviations: dept., department, CRPA, carbapenem-resistant Pseudomonas aeruginosa; CSPA, carbapenem-susceptible Pseudomonas aeruginosa. | | |
